# Supplementary material for: Reprogramming of Adult Retinal Müller Glial Cells into Human-Induced Pluripotent Stem Cells as an Efficient Source of Retinal Cells
Source: Hindawi journal article supplement (doi:10.1155/2019/7858796), 2019-07-15
Supplement: f1 [file 7858796.f1.zip]

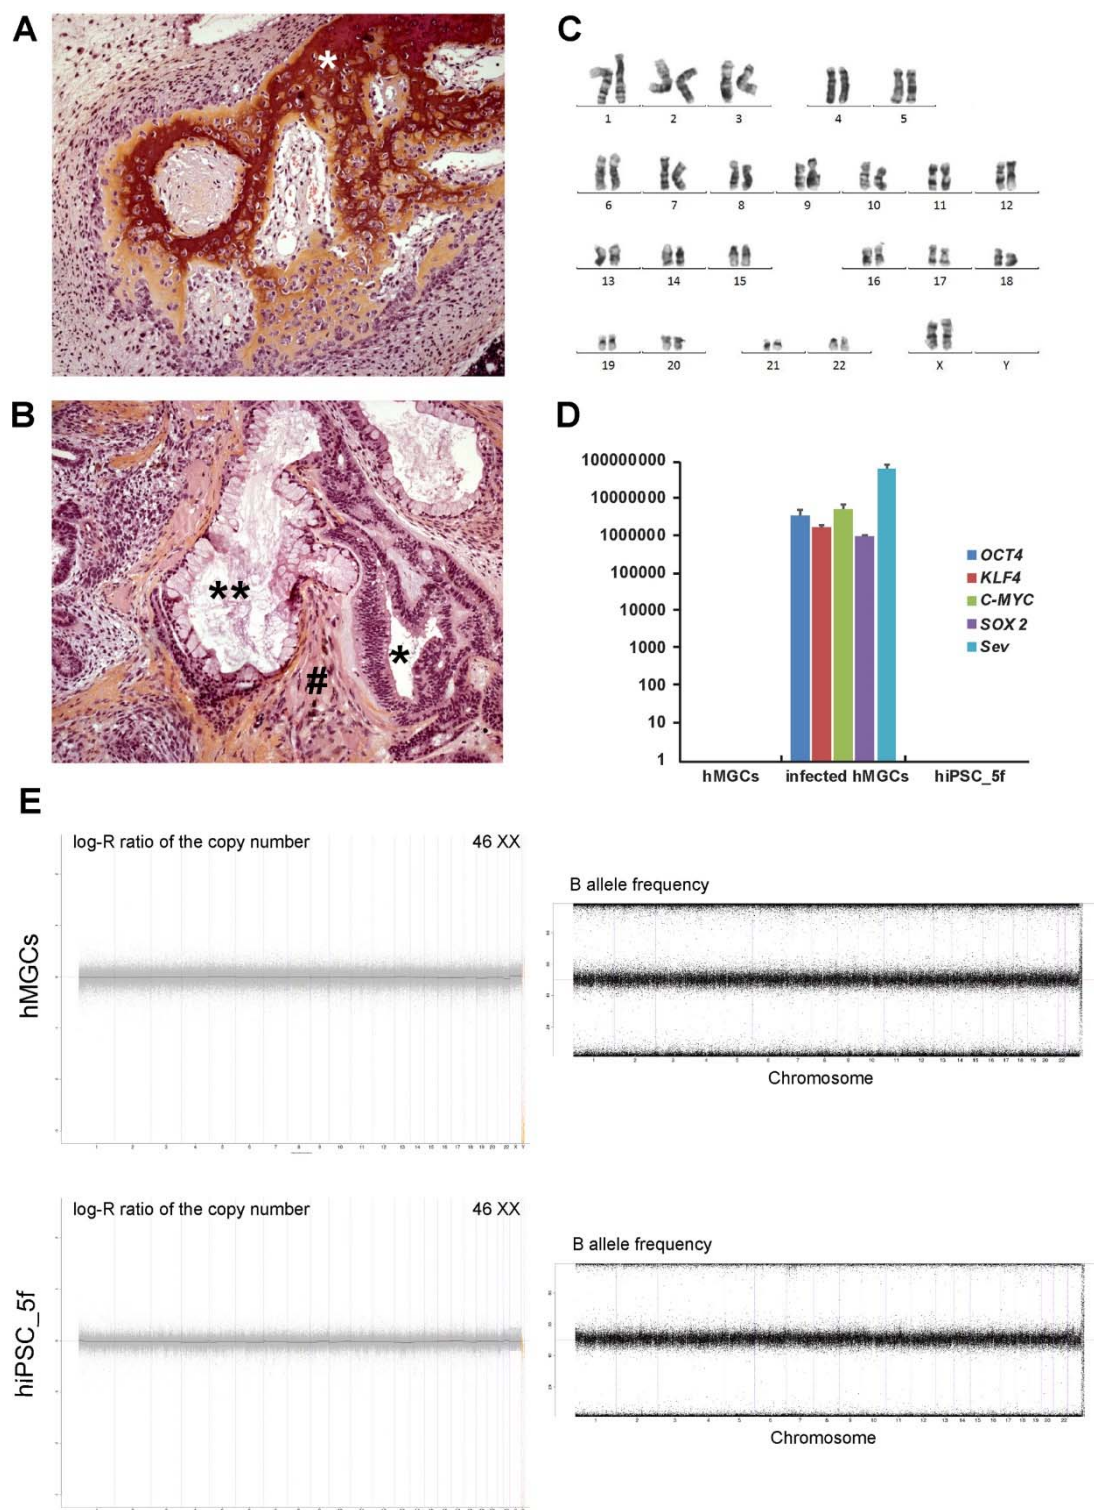

**Figure S1:** Additional characterization of human MGC-derived iPSC lines

**(A-B)** Histological analysis of teratomas observed in NSG mouse after subcutaneous injection of iPSC-5f; (█) bone; (\*) neural tube, (\*\*) intestinal epithelium, (#) muscular

fiber. **(C)** Karyotype analysis of human iPSC-5f. **(D)** Absence of Sendai viral ARN expression in human iPSC-5f cell line. One-week infected-MGCs were used as a positive control and data are normalized to uninfected MGCs. **(E)** SNP array analysis of human MGCs (hMGCs) and human iPSC lines (hiPSC\_5f). Data are presented as the weighted log<sub>2</sub> ratio of the copy number (Y-axis on left panels) or B allele frequency (Y-axis on right panels) and the chromosome number (X-axis).

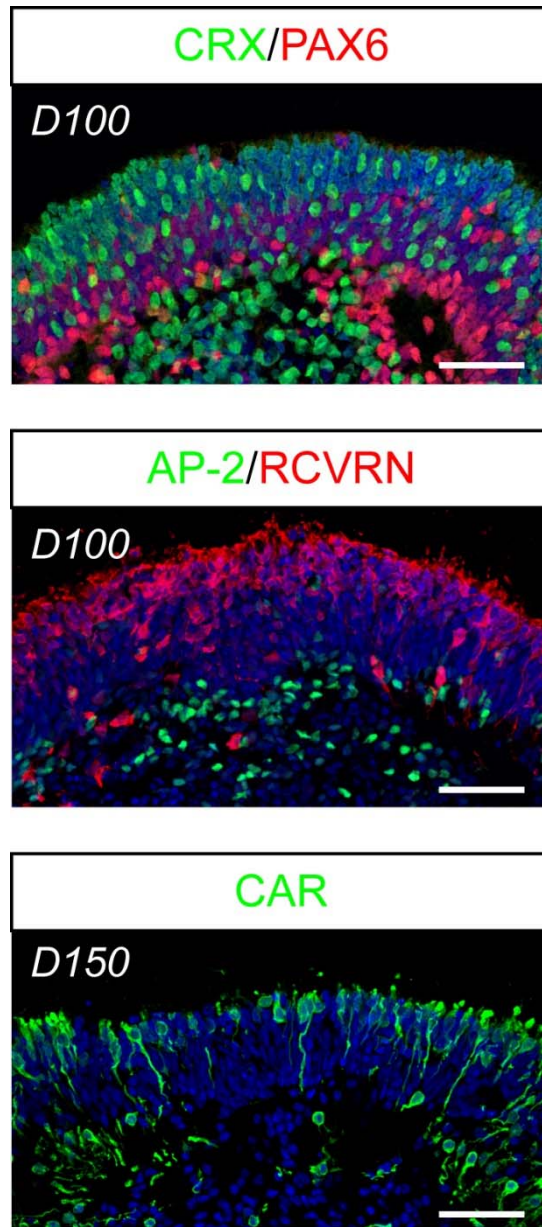

Figure S2: Reproducibility of retinal organoid lamination and photoreceptor differentiation with a human iPSC line derived from fibroblasts.

Immunofluorescence staining with PAX6 (ganglion cells, amacrine/horizontal cells), AP-2 (amacrine cells), CRX and RCVRN (photoreceptors) and CAR (cones) of cryosections from D56 and D100 retinal organoids differentiated from human fibroblast-derived iPSCs (hiPSC-2 clone) in ProB27 medium supplemented with 10%FCS and 2mM Glutamax. Nuclei were counterstained with DAPI (blue). (Scale bars: 50µm).

Movie S1: Movie of a D175 retinal organoid labelled with anti-CRX (white) and Cone arrestin (red). Scale bar = 300µm. (related to Figure 5).

**Table S1:** List of antibodies used for immunohistochemistry analysis

| <b>Antigen</b>    | <b>Species</b>    | <b>Dilution</b> | <b>Source</b>        |
|-------------------|-------------------|-----------------|----------------------|
| AP-2              | Mouse monoclonal  | 1:100           | DSHB                 |
| ARL-13B           | Rabbit polyclonal | 1:100           | Proteintech          |
| BESTROPHIN        | Mouse monoclonal  | 1:1000          | Novus Biologicals    |
| BRN3A             | Mouse monoclonal  | 1:250           | Merck/Millipore      |
| CD18              | Mouse monoclonal  | 1:100           | Bio-Rad/Serotec      |
| CONE ARRESTIN     | Rabbit polyclonal | 1:2000          | Merck/Millipore      |
| CRX               | Mouse monoclonal  | 1:1000          | Abnova               |
| EZRIN             | Mouse monoclonal  | 1:250           | Sigma-Aldrich        |
| GLUTAMIN SYNTHASE | Mouse monoclonal  | 1:500           | Merck/Millipore      |
| IBA1              | Rabbit polyclonal | 1 :100          | WAKO                 |
| KI67              | Mouse monoclonal  | 1:200           | BD Pharmagen         |
| LHX1 (LIM1)       | Mouse monoclonal  | 1:20            | DSHB                 |
| MITF              | Mouse monoclonal  | 1:200           | DAKO                 |
| OCT4              | Rabbit monoclonal | 1:100           | Cell Signaling Tech. |
| OPSIN Blue        | Rabbit polyclonal | 1:500           | Merck/Millipore      |
| OPSIN R/G         | Rabbit polyclonal | 1:500           | Merck/Millipore      |
| PAX6              | Rabbit polyclonal | 1:1000          | Merck/Millipore      |
| PKC $\alpha$      | Rabbit polyclonal | 1:5000          | Santa-Cruz           |
| RAX/RX            | Rabbit polyclonal | 1:5000          | Abcam                |
| RHODOPSIN         | Mouse monoclonal  | 1:500           | Merck/Millipore      |
| RECOVERIN         | Rabbit polyclonal | 1:5000          | Merck/Millipore      |
| SSEA4             | Mouse monoclonal  | 1:200           | Cell Signaling Tech. |
| SOX2              | Rabbit monoclonal | 1:400           | Cell Signaling Tech. |
| TRA1-81           | Mouse monoclonal  | 1:100           | Cell Signaling Tech. |
| VIMENTIN          | Mouse monoclonal  | 1:200           | Merck/Millipore      |
| VSX2 (CHX10)      | Goat polyclonal   | 1:2000          | Santa Cruz           |
| ZO1               | Rabbit polyclonal | 1:250           | ThermoFischer Sci.   |

**Table S2:** List of TaqMan® Gene Expression ID Assays used for RT-qPCR

| <b>Gene Symbols</b> | <b>Assays IDs (LifeTechnologies)</b> |
|---------------------|--------------------------------------|
| 18S                 | 18S-Hs999999901_s1                   |
| BEST1               | BEST1-00188249_m1                    |
| CRX                 | CRX-Hs00230899_m1                    |
| DKK1                | DKK1-Hs00183740_m1                   |
| DNMT3B              | DNMT3B-Hs00171876_m1                 |
| EN1                 | EN1- Hs00154977_m1                   |
| GAD2                | GAD2-Hs00609534_m1                   |
| GDF3                | GDF3-Hs00220998_m1                   |
| HAND1               | HAND1-Hs00231848_m1                  |
| LHX2                | LHX2-Hs00180351_m1                   |
| LIN28A              | LIN28A-Hs00702808_s1                 |
| MERTK               | MERTK-Hs01031973_m1                  |
| MITF                | MITF-Hs01117294_m1                   |
| NANOG               | NANOG-Hs02387400_g1                  |
| NEUROD1             | NEUROD1-Hs00159598_m1                |
| NKX2-1              | NKX2-1- Hs00968940_m1                |
| NODAL               | NODAL-Hs00415443_m1                  |
| NOGGIN              | NOG-Hs00271352_s1                    |
| NRL                 | NRL-Hs00172997_m1                    |
| PAX6                | PAX6-Hs00240871_m1                   |
| PDEF                | SERPINF1-Hs01106934_m1               |
| POU5F1 (OCT4)       | POU5F1-Hs00999632_g1                 |
| RAX                 | RAX-Hs00429459_m1                    |
| RPE65               | RPE65-Hs01071462_m1                  |
| SIX3                | SIX3-Hs00193667_m1                   |
| SOX2                | SOX2-Hs01053049_s1                   |
| TDGF1               | TDGF1- Hs02339497_g1                 |
| TERT                | TERT-Hs00972656_m1                   |
| VSX2                | VSX2-Hs00766959_s1                   |
| ZFP42               | ZFP42- Hs01938187_s1                 |
