# Supplementary material for: Reprogramming of Adult Retinal Müller Glial Cells into Human-Induced Pluripotent Stem Cells as an Efficient Source of Retinal Cells
Source: Stem Cells Int. 2019 Jul 15;2019:7858796. doi: 10.1155/2019/7858796 (PMC6664555; doi:10.1155/2019/7858796)
Supplement: Supplementary Materials — Figure S1: additional characterization of human MGC-derived iPSC lines Figure S2: reproducibility of retinal organoid lamination and photoreceptor differentiation with a human iPSC line derived from fibroblasts. Table S1: list of antibodies used for immunohistochemistry analysis. Table S2: list of TaqMan® Gene Expression ID Assays used for RT-qPCR. Movie S1: movie of a D175 retinal organoid labelled with anti-CRX (white) and Cone arrestin (red). Scale bar = 300 μm. [file 7858796.f1.zip]

Archive with 2 entries (2 files):
- D175 Retinal organoid_CRX (white) - CAR (red).avi
- Supplementary Materials.pdf
